# Supplementary material for: Drug-induced metabolic remodeling of immune cell repertoire generates an effective broad-range antimicrobial effect
Source: Research Square preprint supplement (doi:10.21203/rs.3.rs-7077811/v1), 2025-07-29
Supplement: Supplementary file 1 [file b5a890ca03b426e10d32a8bf.docx]

**Drug-induced metabolic remodeling of immune cell repertoire generates an effective broad-range antimicrobial effect**

Claudia Hollmann1,°, Eun Chan Park2,°, Zheng Liu1, Faye Nourollahi2, Georgy Nikolayshvili3, Jonathan Dietz2, Emīls Edgars Bašēns3, Mehul Vora4, Trushnal S. Waghmare3, Tongbin Li5, Fabian Imdahl6, Christopher Rongo2,#, and Bhupesh K Prusty1,3,#

1Institute of Virology and Immunobiology, University of Würzburg, Germany.

2The Waksman Institute, Rutgers The State University of New Jersey, Piscataway, New Jersey 08854, United States of America.

3Institute of Microbiology and Virology, Riga Stradiņš University, Riga, Latvia.

4ModOmics Ltd, Southampton, UK

5AccuraScience, Johnston, IA, United States of America.

6Helmholtz Institute for RNA-based Infection Research, Würzburg, Germany.

**Supplementary Figure 1:** This file contains **the** gating strategy for flow cytometry.

**Supplementary Figure 2:** This file containsraw, uncropped data for gels.
