# Supplementary figures and images for: Drug-induced metabolic remodeling of immune cell repertoire generates an effective broad-range antimicrobial effect
Source: Research Square preprint supplement (doi:10.21203/rs.3.rs-7077811/v1), 2025-07-29

Extended Data Figure 20

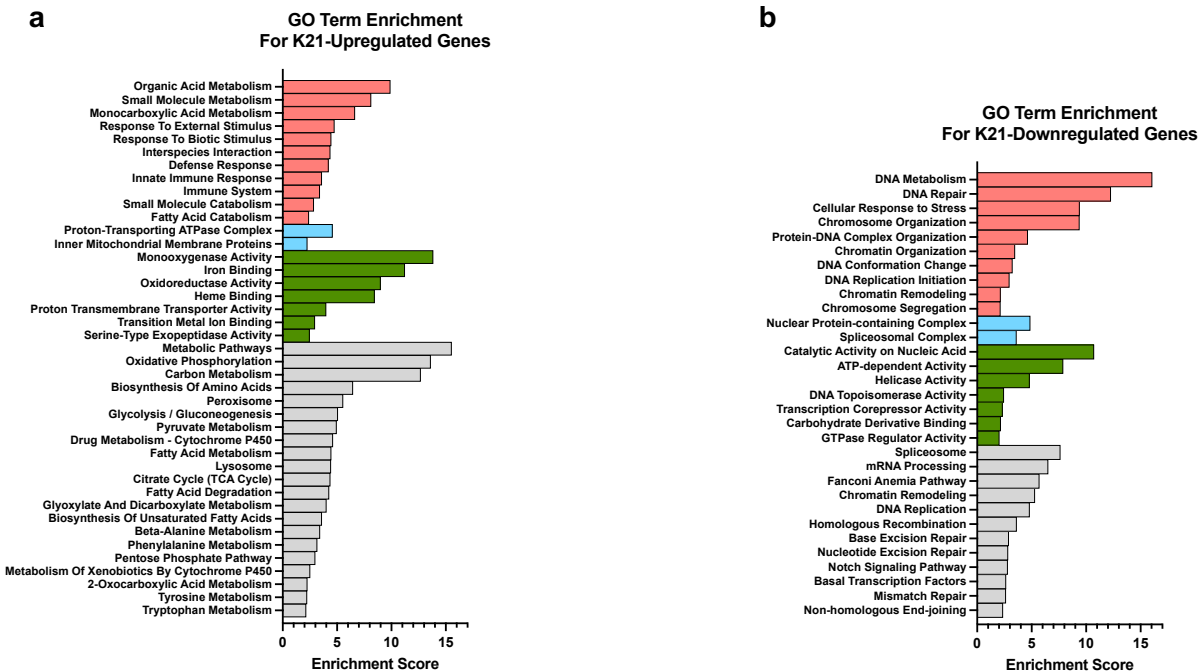

Supplement: Supplementary file 1 [file 14f3d94a960ff7fbb57cfdba.pdf]

Extended Data Figure 17

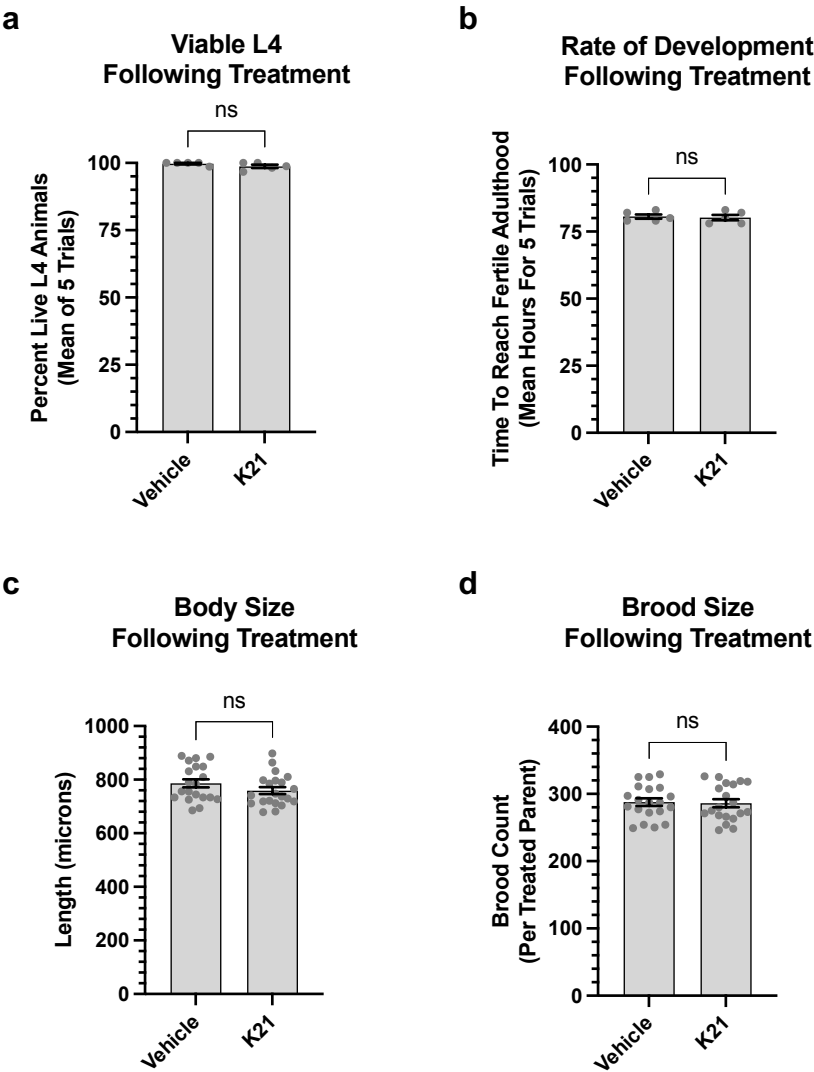

Supplement: Supplementary file 2 [file 5a4a42888bf5ac0d110dd56d.pdf]
